# Supplementary material for: Smart surfaces: reversible switching of a polymeric hydrogel topography
Source: Royal Society of Chemistry journal article supplement (doi:10.1039/c1sm06191g), 2011-11-30
Supplement: c1sm06191g.pdf [file c1sm06191g.pdf]

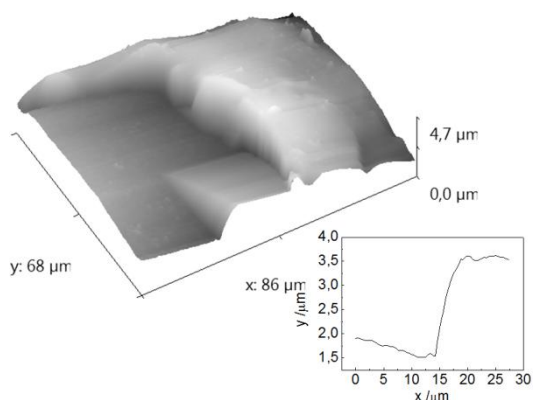

**Fig.S1.** AFM image of the mark left by the blade to determine the PNPAM film thickness. Insert a profile of the topography.

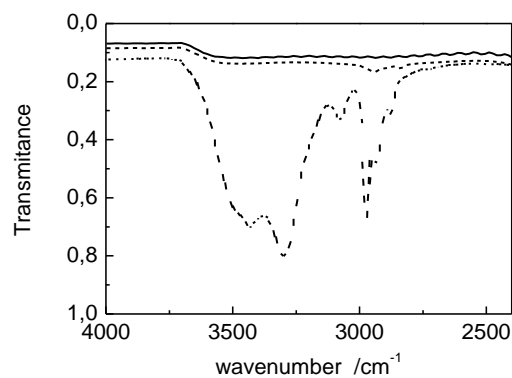

**Fig.S2.** FTIR spectra (4000-2200 cm<sup>-1</sup>) of clear glass (solid line), MPTS modified glass (dotted line) and MPTES-PNIPAM glass (dashed line).

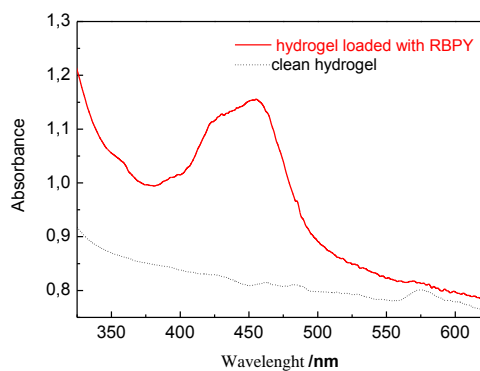

**Fig.S3** UV-visible spectra of MPTS-PNIPAM on glass (dotted line) and MPTS-PNIPAM on glass loaded with RBPY (red full line).

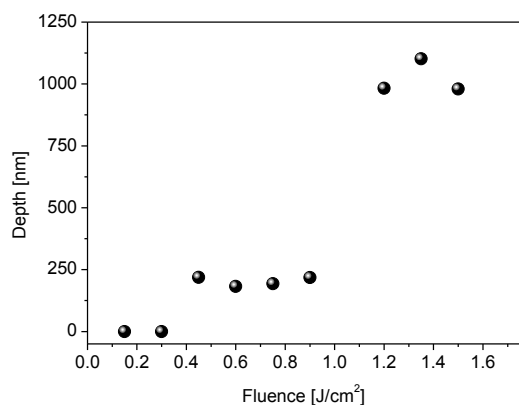

**Fig.S4** Graph of the ablation depth, measured by AFM, as a function of laser fluence

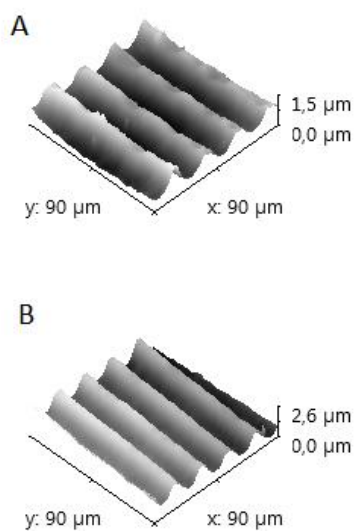

**Fig.S5** AFM image of the patterns obtained at two different fluences above the threshold fluence A) 1.2 J/cm<sup>2</sup> y B) 1.35J/cm<sup>2</sup>.

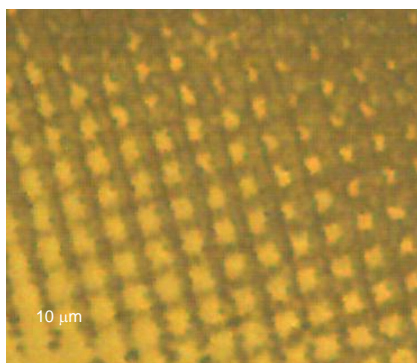

**Fig.S6** Optical micrographs of a square pattern produced by DLIP of a doped hydrogel. The pattern ins produced using two successive pulses and rotating the sample 90° between pulses.

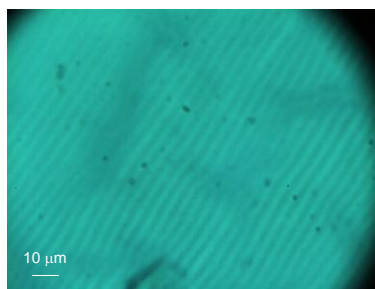

**Fig.S7** Optical micrograph of a pattern produced by DLIP on a hydrogel. doped with methylene blue.

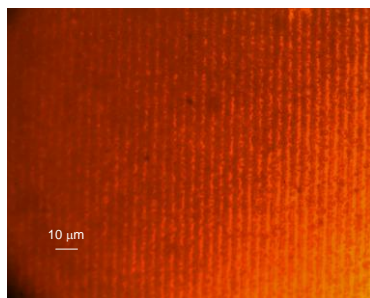

**Fig.S8** Optical micrograph of a pattern produced by DLIP on a poly(acrylamide-co-acrylic acid) hydrogel doped with RBPY.

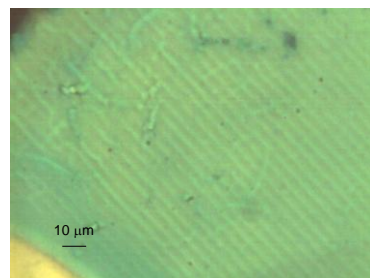

**Fig.S9** Optical micrographs of a pattern produced by DLIP on a poly(N-isopropylacrylamide-co-(2%) acrylamidopropanesulfonic acid) hydrogel doped with methylene blue.
